# Supplementary material
Source: Springer Nature journal article supplement (https://www.springermedizin.de/resource/supplementary/12936_2009_1212_MOESM1_ESM.pdf/9549222)

## K1 type

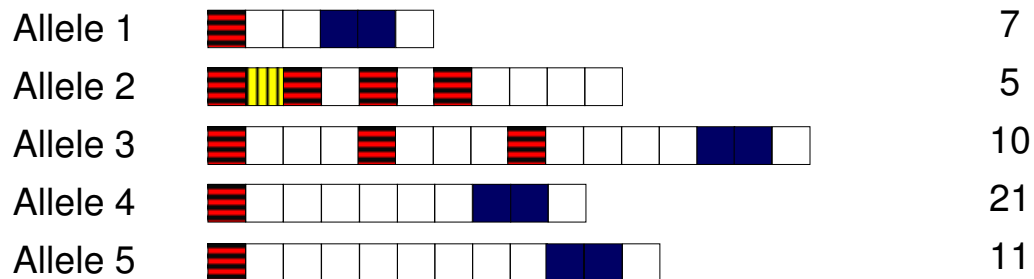

Total (n)

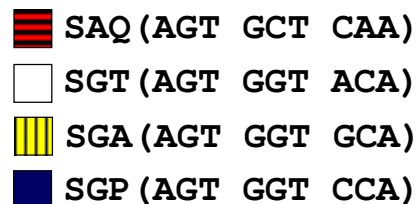

## MAD20 type

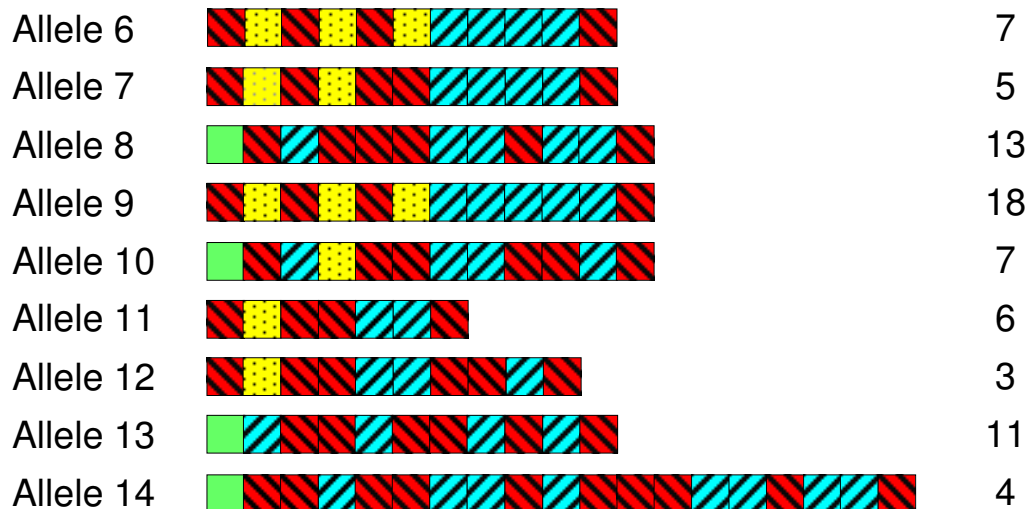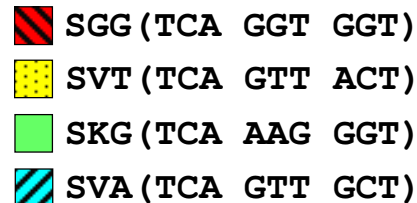

Supplement: MOESM1 [file 9549222]
